# Supplementary material for: The divergent effects of strong NHC donation in catalysis
Source: PubMed Central journal article supplement (PMC5947514; doi:10.1039/c5sc02592c), 2015-10-06
Supplement: SC-006-C5SC02592C-s001.pdf [file SC-006-C5SC02592C-s001.pdf]

Supplementary Information for:

## The Divergent Effects of Strong NHC Donation in Catalysis

Justin A. M. Lummiss, Carolyn S. Higman, Devon L. Fyson, Robert McDonald,<sup>†</sup>  
and Deryn E. Fogg\*

*Center for Catalysis Research & Innovation, Chemistry Department, University of Ottawa,  
Ottawa, ON, Canada, K1N 6N5*

### Table of Contents

|                                                                                                                                 |    |
|---------------------------------------------------------------------------------------------------------------------------------|----|
| 1. NOE spectra for <i>s</i> - <b>GIIm</b> , <i>u</i> - <b>GIIm</b> , <i>s</i> - <b>GII</b> , and <i>u</i> - <b>GII</b>          | S2 |
| 2. Inducing rotation in H <sub>2</sub> IMes complex <i>s</i> - <b>GIIm</b> at elevated temperatures                             | S4 |
| 3. Derivation of the [PCy <sub>3</sub> ] dependence of <b>GIIm</b> decomposition                                                | S5 |
| 4. Rate profiles for thermolysis of <i>s</i> - <b>GIIm</b> and <i>u</i> - <b>GIIm</b> at 40 °C and 80 °C                        | S6 |
| 5. Half-lives for <i>s</i> - <b>GIIm</b> and <i>u</i> - <b>GIIm</b> at 40 °C, 60 °C, and 80 °C in C <sub>6</sub> D <sub>6</sub> | S7 |
| 6. Summary of key NMR data for <b>GIIm</b> and <b>GII</b> in a range of solvents                                                | S7 |
| 7. Crystallographic details for <i>u</i> - <b>GIIm</b>                                                                          | S7 |
| 8. References                                                                                                                   | S8 |

### S1. NOESY spectra for *s*-**GIIm**, *u*-**GIIm**, *s*-**GII**, and *u*-**GII**

<sup>†</sup> X-ray Crystallography Laboratory, Department of Chemistry, University of Alberta, Edmonton, Alberta, Canada, T6G 2G2

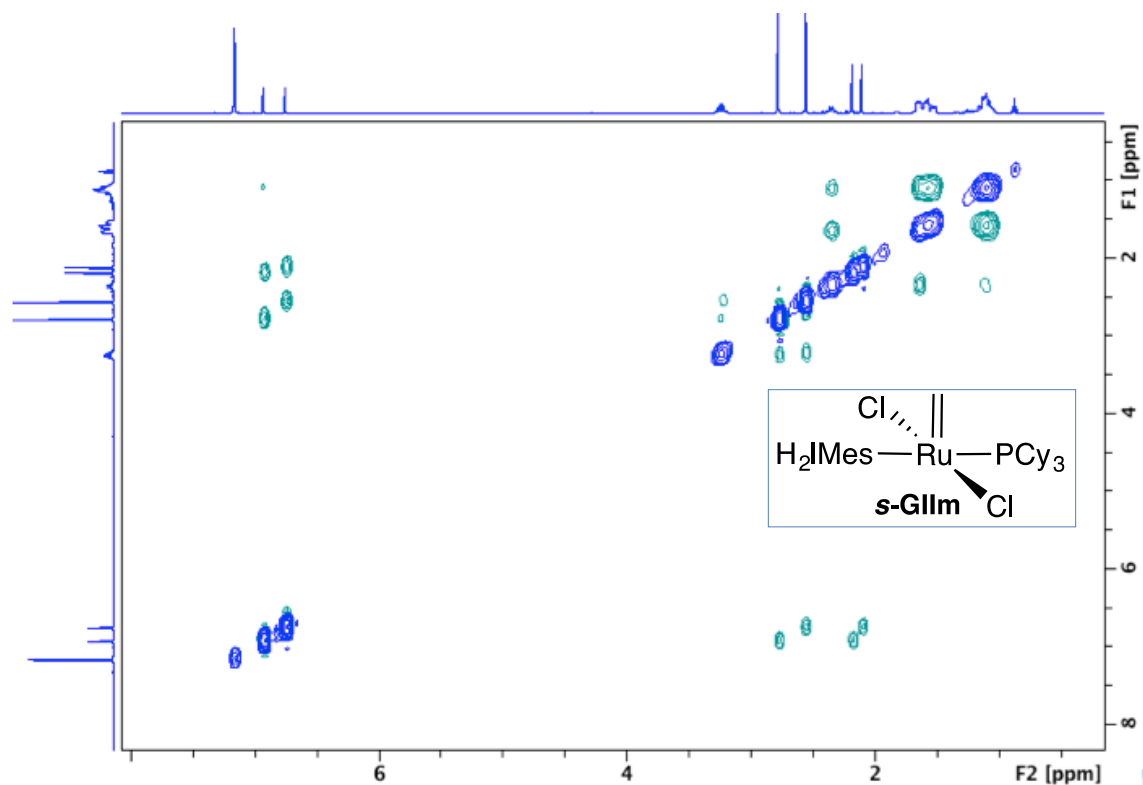

**Figure S1.**  $^1\text{H}$  NMR NOESY spectrum (500.1 MHz,  $\text{C}_6\text{D}_6$ ) for methyldene complex  $\text{RuCl}_2(\text{H}_2\text{IMes})(\text{PCy}_3)(=\text{CH}_2)$ , *s*-GIIIm.

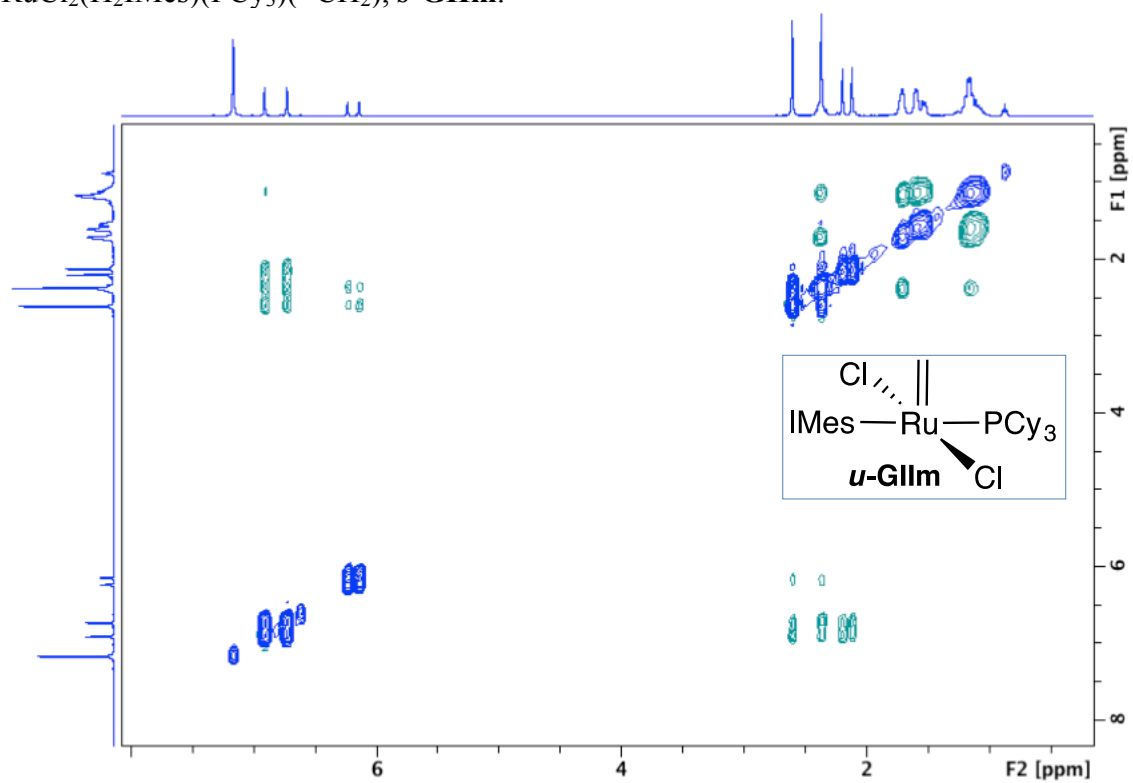

**Figure S2.**  $^1\text{H}$  NMR NOESY spectrum (500.1 MHz,  $\text{C}_6\text{D}_6$ ) for  $\text{RuCl}_2(\text{IMes})(\text{PCy}_3)(=\text{CH}_2)$ , *u*-GIIIm.

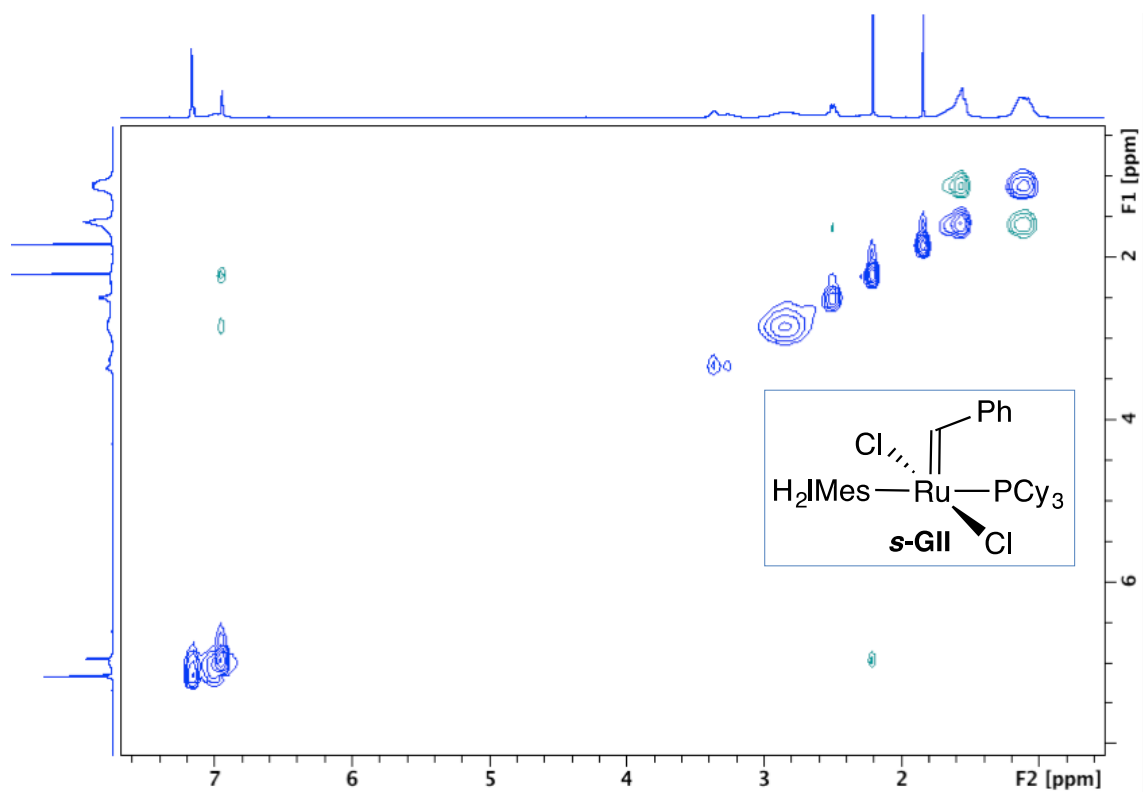

**Figure S3.**  $^1\text{H}$  NMR NOESY spectrum (500.1 MHz,  $\text{C}_6\text{D}_6$ ) for  $\text{RuCl}_2(\text{H}_2\text{IMes})(\text{PCy}_3)(=\text{CHPh})$ , *s*-GII.

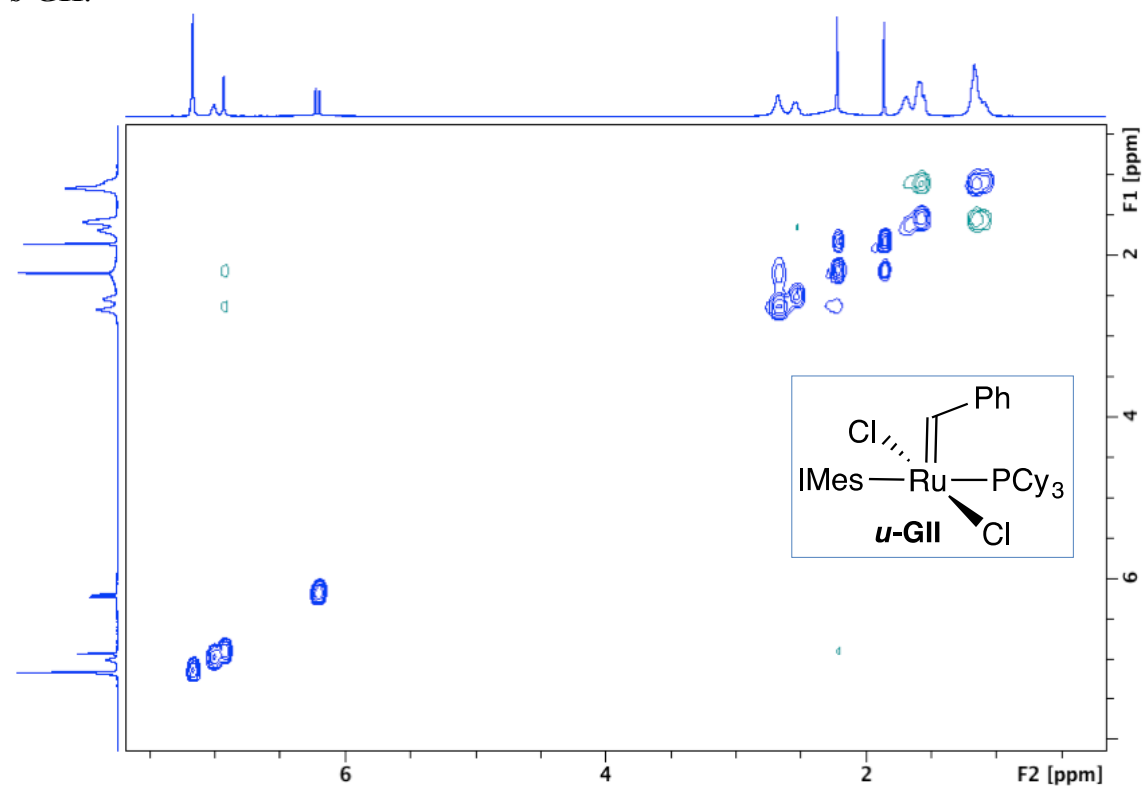

**Figure S4.**  $^1\text{H}$  NMR NOESY spectrum (500.1 MHz,  $\text{C}_6\text{D}_6$ ) for  $\text{RuCl}_2(\text{IMes})(\text{PCy}_3)(=\text{CHPh})$ , *u*-GII.

**S2. Inducing rotation in *s*-GII by raising the temperature**

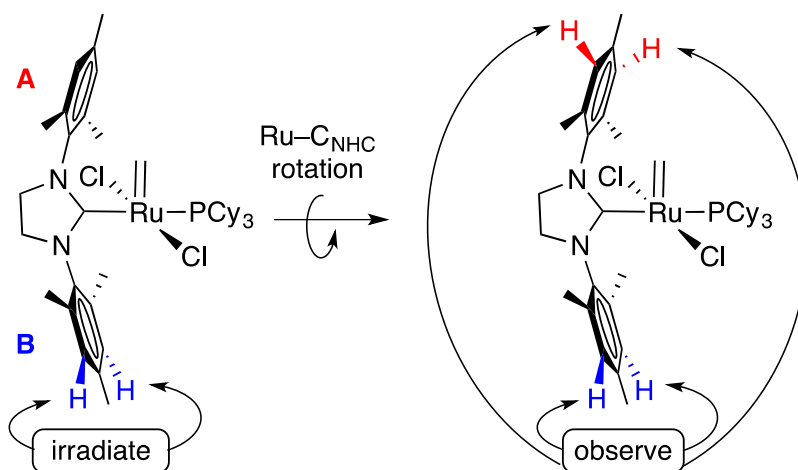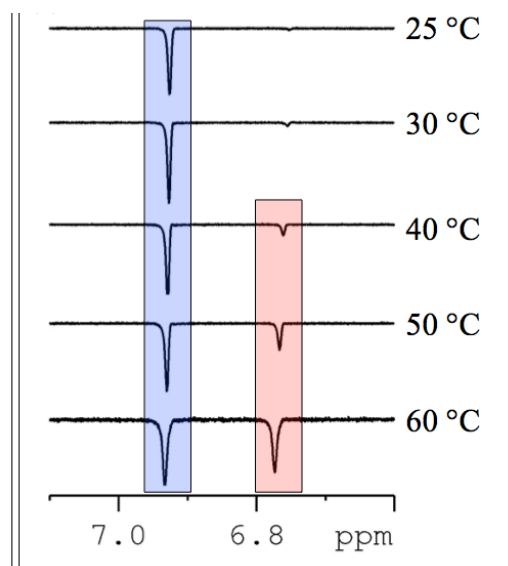

**Figure S5.** Inducing NHC rotation in *s-GIIIm*. (a) Distinguishing mesityl rings by selective irradiation of the Mes CH signal for Ring **B**. (b) Onset of EXSY enhancement of CH signals in Ring **A** at 40 °C.  $^1\text{H}$  NMR, 500 MHz,  $\text{C}_6\text{D}_6$ ; 2 s mixing.

### S3. Derivation of the [PCy<sub>3</sub>] dependence of GIIIm decomposition

#### (a) Dissociative pathway

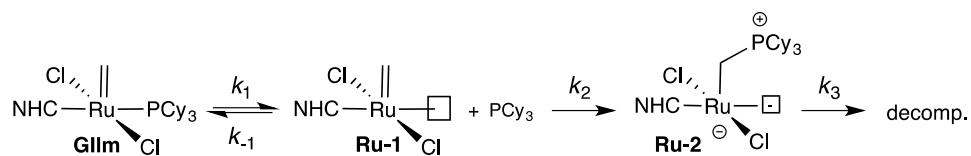

$$\begin{aligned} \text{decomp. rate} &= -d[\text{GIIIm}] / dt \\ &= k_3 [\text{Ru-2}] \end{aligned}$$

Applying the steady state approximation to spectroscopically unobservable **Ru-2**,

$$\begin{aligned} k_3 [\text{Ru-2}] &= k_2 [\text{Ru-1}] [\text{PCy}_3] \\ [\text{Ru-2}] &= k_2 / k_3 [\text{Ru-1}] [\text{PCy}_3] \\ \text{then rate} &= k_2 [\text{Ru-1}] [\text{PCy}_3] \end{aligned}$$

Applying the steady state approximation to spectroscopically unobservable **Ru-1**,

$$\begin{aligned} k_1 [\text{GIIIm}] &= k_{-1} [\text{Ru-1}] [\text{PCy}_3] + k_2 [\text{Ru-1}] [\text{PCy}_3] \\ [\text{Ru-1}] &= \frac{k_1 [\text{GIIIm}]}{(k_{-1} + k_2) [\text{PCy}_3]} \\ \text{then rate} &= \frac{k_1 k_2 [\text{GIIIm}] [\text{PCy}_3]}{(k_{-1} + k_2) [\text{PCy}_3]} \\ &= \frac{k_1 k_2}{(k_{-1} + k_2)} [\text{GIIIm}] \end{aligned}$$

Thus the rate of decomposition is independent of [PCy<sub>3</sub>]

#### (b) Associative pathway

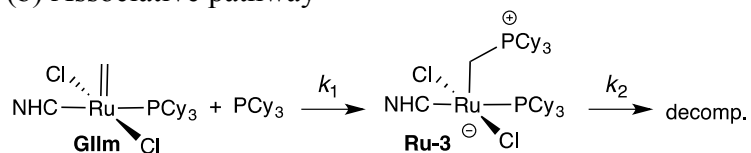

$$\begin{aligned} \text{decomp. rate} &= -d[\text{GIIIm}] / dt \\ &= k_2 [\text{Ru-3}] \end{aligned}$$

Applying the steady state approximation to spectroscopically unobservable **Ru-3**,

$$\begin{aligned} k_2 [\text{Ru-3}] &= k_1 [\text{GIIIm}] [\text{PCy}_3] \\ [\text{Ru-3}] &= k_1 / k_2 [\text{GIIIm}] [\text{PCy}_3] \\ \text{then rate} &= k_1 [\text{GIIIm}] [\text{PCy}_3] \end{aligned}$$

Thus the rate of decomposition has a first-order dependence on [PCy<sub>3</sub>]

#### S4. Rate profiles for PCy<sub>3</sub> loss from *s*-GIIIm and *u*-GIIIm at 40 °C and 80 °C

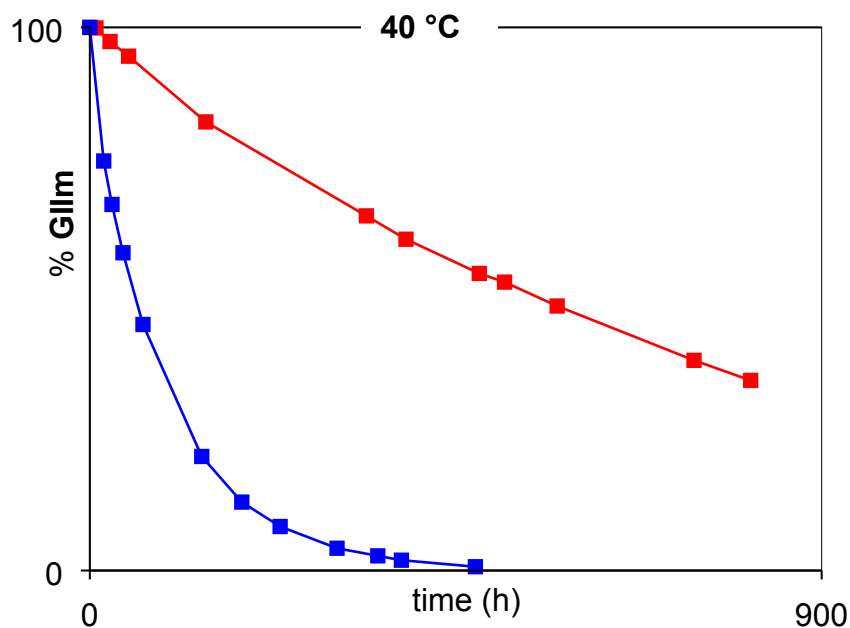

**Figure S6.** Assessing the stability of *s*-GIIIm (blue) and *u*-GIIIm (red) at 40 °C in C<sub>6</sub>D<sub>6</sub> (<sup>1</sup>H NMR integration vs. TMB as internal standard; measuring decreases in integration following t<sub>0</sub>).

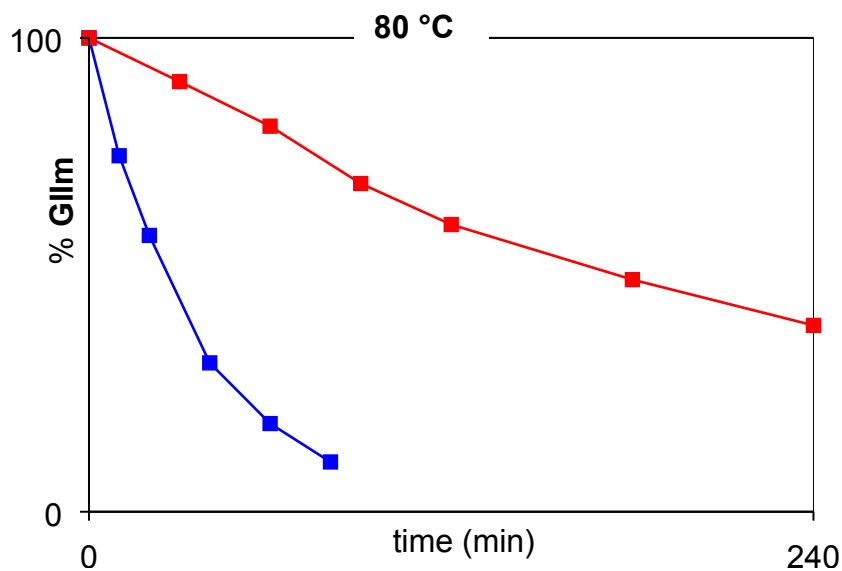

**Figure S7.** Assessing the stability of *s*-GIIIm (blue) and *u*-GIIIm (red) at 80 °C in C<sub>6</sub>D<sub>6</sub> (<sup>1</sup>H NMR integration vs. TMB as internal standard; measuring decreases in integration following t<sub>0</sub>).

## S5. Half-lives for *s*-GII<sub>m</sub> and *u*-GII<sub>m</sub> at 40 °C, 60 °C, and 80 °C in C<sub>6</sub>D<sub>6</sub>

**Table S1.** Half-lives data corresponding to the thermolysis experiments of Fig. 4.<sup>a</sup>

| T (°C) | <i>u</i> -GII <sub>m</sub> | <i>s</i> -GII <sub>m</sub> |
|--------|----------------------------|----------------------------|
| 40     | 545                        | 63                         |
| 60     | 34                         | 4.1                        |
| 80     | 2.9                        | 0.4                        |

<sup>a</sup>Assessed by <sup>1</sup>H NMR: 300 MHz, TMB used as internal standard

## S6. Key chemical shifts for GII<sub>m</sub> and GII in common solvents

**Table 2.** Diagnostic <sup>1</sup>H and <sup>31</sup>P chemical shifts for GII<sub>m</sub> and GII complexes.<sup>a</sup>

| Solvent                         | $\delta_{\text{H}}$ (Ru=CHR) |                            | $\delta_{\text{P}}$ (Ru-PCy <sub>3</sub> ) |                            |
|---------------------------------|------------------------------|----------------------------|--------------------------------------------|----------------------------|
|                                 | <i>u</i> -GII <sub>m</sub>   | <i>s</i> -GII <sub>m</sub> | <i>u</i> -GII <sub>m</sub>                 | <i>s</i> -GII <sub>m</sub> |
| R = H                           |                              |                            |                                            |                            |
| C <sub>6</sub> D <sub>6</sub>   | 18.77                        | 18.42                      | 40.8                                       | 38.2                       |
| C <sub>7</sub> D <sub>8</sub>   | 18.65                        | 18.29                      | 40.7                                       | 38.0                       |
| CD <sub>2</sub> Cl <sub>2</sub> | 18.09                        | 17.73                      | 39.9                                       | 37.1                       |
| CDCl <sub>3</sub>               | 18.15                        | 17.78                      | 39.2                                       | 36.2                       |
| THF-d <sub>8</sub>              | 18.21                        | 17.86                      | 40.3                                       | 37.6                       |
| R = Ph                          |                              |                            |                                            |                            |
| C <sub>6</sub> D <sub>6</sub>   | 19.94                        | 19.65                      | 32.0                                       | 30.1                       |
| C <sub>7</sub> D <sub>8</sub>   | 19.84                        | 19.55                      | 32.0                                       | 30.0                       |
| CD <sub>2</sub> Cl <sub>2</sub> | 19.38                        | 19.08                      | 32.1                                       | 29.9                       |
| CDCl <sub>3</sub>               | 19.43                        | 19.13                      | 31.8                                       | 29.6                       |
| THF-d <sub>8</sub>              | 19.55                        | 19.25                      | 31.9                                       | 29.9                       |

<sup>a</sup> 300.1 MHz (<sup>1</sup>H NMR) or 121.6 MHz (<sup>31</sup>P{<sup>1</sup>H} NMR); 22 °C.

## 7. Crystallographic details for *u*-GIIIm.

**Table S2.** Crystallographic Details for *u*-GIIIm.

|                                                                                                        |                                                                                                          |
|--------------------------------------------------------------------------------------------------------|----------------------------------------------------------------------------------------------------------|
| <i>A. Crystal data</i>                                                                                 |                                                                                                          |
| formula                                                                                                | C <sub>40</sub> H <sub>59</sub> Cl <sub>2</sub> N <sub>2</sub> PRu                                       |
| formula weight                                                                                         | 770.83                                                                                                   |
| crystal dimensions (mm)                                                                                | 0.16 × 0.14 × 0.02                                                                                       |
| crystal system                                                                                         | monoclinic                                                                                               |
| space group                                                                                            | <i>P</i> 2 <sub>1</sub> / <i>n</i> (an alternate setting of <i>P</i> 2 <sub>1</sub> / <i>c</i> [No. 14]) |
| unit cell parameters <sup>a</sup>                                                                      |                                                                                                          |
| <i>a</i> (Å)                                                                                           | 12.2117 (3)                                                                                              |
| <i>b</i> (Å)                                                                                           | 18.0562 (6)                                                                                              |
| <i>c</i> (Å)                                                                                           | 18.2926 (6)                                                                                              |
| β (deg)                                                                                                | 103.741 (2)                                                                                              |
| <i>V</i> (Å <sup>3</sup> )                                                                             | 3918.0 (2)                                                                                               |
| <i>Z</i>                                                                                               | 4                                                                                                        |
| ρ <sub>calcd</sub> (g cm <sup>-3</sup> )                                                               | 1.307                                                                                                    |
| μ (mm <sup>-1</sup> )                                                                                  | 5.088                                                                                                    |
| <i>B. Data collection and refinement</i>                                                               |                                                                                                          |
| Diffractionmeter                                                                                       | Bruker D8/APEX II CCD <sup>b</sup>                                                                       |
| radiation (λ [Å])                                                                                      | Cu Kα (1.54178) (microfocus source)                                                                      |
| temperature (°C)                                                                                       | -100                                                                                                     |
| scan type                                                                                              | ω and φ scans (1.0°) (5 s exposures)                                                                     |
| data collection 2θ limit (deg)                                                                         | 135.98                                                                                                   |
| total data collected                                                                                   | 25622 (-14 ≤ <i>h</i> ≤ 14, -21 ≤ <i>k</i> ≤ 21, -21 ≤ <i>l</i> ≤ 21)                                    |
| independent reflections                                                                                | 6912 ( <i>R</i> <sub>int</sub> = 0.1444)                                                                 |
| number of observed reflections ( <i>NO</i> )                                                           | 4015 [ <i>F</i> <sub>o</sub> <sup>2</sup> ≥ 2σ( <i>F</i> <sub>o</sub> <sup>2</sup> )]                    |
| structure solution method                                                                              | Patterson/structure expansion ( <i>DIRDIF-2008</i> ) <sup>1</sup>                                        |
| refinement method                                                                                      | full-matrix least-squares on <i>F</i> <sup>2</sup> ( <i>SHELXL-97</i> ) <sup>2</sup>                     |
| absorption correction method                                                                           | Gaussian integration (face-indexed)                                                                      |
| range of transmission factors                                                                          | 0.8876–0.4910                                                                                            |
| data/restraints/parameters                                                                             | 6912 / 1 <sup>c</sup> / 429                                                                              |
| extinction coefficient ( <i>x</i> ) <sup>d</sup>                                                       | 0.00016(3)                                                                                               |
| goodness-of-fit ( <i>S</i> ) <sup>e</sup> [all data]                                                   | 0.954                                                                                                    |
| final <i>R</i> indices <sup>f</sup>                                                                    |                                                                                                          |
| <i>R</i> <sub>1</sub> [ <i>F</i> <sub>o</sub> <sup>2</sup> ≥ 2σ( <i>F</i> <sub>o</sub> <sup>2</sup> )] | 0.0517                                                                                                   |
| <i>wR</i> <sub>2</sub> [all data]                                                                      | 0.0517                                                                                                   |
| largest difference peak and hole                                                                       | 0.499 and -0.699 e Å <sup>-3</sup>                                                                       |

<sup>a</sup>Obtained from least-squares refinement of 3223 reflections with 7.92° < 2θ < 105.86°.

<sup>b</sup>Programs for diffractometer operation, data collection, data reduction and absorption correction were those supplied by Bruker.

<sup>c</sup>The C1–H1A and C1–H1B distances were constrained to be equal (within 0.06 Å) during refinement.

<sup>d</sup>*F*<sub>c</sub><sup>\*</sup> = *kF*<sub>c</sub> [1 + *x*{0.001*F*<sub>c</sub><sup>2</sup>λ<sup>3</sup>/sin(2θ)}]<sup>-1/4</sup> where *k* is the overall scale factor.

<sup>e</sup>*S* = [Σ*w*(*F*<sub>o</sub><sup>2</sup> - *F*<sub>c</sub><sup>2</sup>)<sup>2</sup>/(*n* - *p*)]<sup>1/2</sup> (*n* = number of data; *p* = number of parameters varied; *w* = [σ<sup>2</sup>(*F*<sub>o</sub><sup>2</sup>) + (0.0490*P*)<sup>2</sup>]<sup>-1</sup> where *P* = [Max(*F*<sub>o</sub><sup>2</sup>, 0) + 2*F*<sub>c</sub><sup>2</sup>]/3).

<sup>f</sup>*R*<sub>1</sub> = Σ||*F*<sub>o</sub>|| - |*F*<sub>c</sub>||/Σ||*F*<sub>o</sub>||; *wR*<sub>2</sub> = [Σ*w*(*F*<sub>o</sub><sup>2</sup> - *F*<sub>c</sub><sup>2</sup>)<sup>2</sup>/Σ*w*(*F*<sub>o</sub><sup>4</sup>)]<sup>1/2</sup>.



## 8. References

- (1) Beurskens, P. T.; Beurskens, G.; de Gelder, R.; Smits, J. M. M.; Garcia-Granda, S.; Gould, R. O. *The DIRDIF-2008 Program System*, Crystallography Laboratory, Radboud University: Nijmegen, The Netherlands, 2008.
- (2) Sheldrick, G. M. *Acta Crystallogr.* **2008**, *A64*, 112–122.
